# Supplementary material for: Myocardial Gene Expression ofT-bet,GATA-3,Ror-γt,FoxP3, and Hallmark Cytokines in Chronic Chagas Disease Cardiomyopathy: An Essentially Unopposed TH1-Type Response
Source: Hindawi journal article supplement (doi:10.1155/2014/914326), 2014-01-01
Supplement: f1 [file 914326.f1.pdf]

Table S1. Characteristics of the primers.

| Gene Name     | Gene bank accession number | Sequence 5'→3'                                       | Amplicon (pb) | Tm Amplicon (°C) |
|---------------|----------------------------|------------------------------------------------------|---------------|------------------|
| IL-1 $\beta$  | M15330                     | AGGATATGGAGCAACAAGTGGTG<br>ATTCTTTTCCTTGAGGCCCAAG    | 98            | 80               |
| IL-4          | M13982                     | TCCGATTCTGAAACGGCT<br>TCTGGTTGGCTTCCTTCACAG          | 81            | 83               |
| IL-5          | NM_000879                  | CTCATCGAACTCTGCTGATAGCC<br>CAGTGTGCCTATTCCCTGAAAGTA  | 110           | 75               |
| IL-6          | M14584                     | TCAGCCCTGAGAAAGGAGACATG<br>GCATCCATCTTTTTTCAGCCATCT  | 111           | 77               |
| IL-12p35      | NM_000882                  | GCAAAGCTTCTGATGGATCCTAAG<br>TTGAAATTCAGGGCCTGCAT     | 92            | 77               |
| IL-12p40      | NM_002187                  | TGTCAAAGCAGCAGAGGCTCT<br>CTTGTGTCCCCTCTGACTCTCTC     | 91            | 82               |
| IL-13         | X69079                     | ACCTGACAGCTGGCATGTAAGT<br>AGAATCCGCTCAGCATCCTCT      | 99            | 82               |
| IL-17         | NM_002190                  | CAATGACCTGGAAATACCCAA<br>TGAAGGCATGTGAAATCGAGA       | 52            | 71               |
| IL-18         | D49950                     | GCATCAACTTTGTGGCAATGAAA<br>AAGCTTGCCAAAGTAATCTGACTCC | 95            | 73               |
| IL-23         | NM_016584                  | GGACAACAGTCAGTTCTGCTTGC<br>AGGCTCCCCTGTGAAAATATCC    | 91            | 78               |
| IL-27         | NM_145659                  | CCCTGATGTTTCCCTGACCTTC<br>CAGGGCATGGAAGGCTGAA        | 97            | 85               |
| TGF- $\beta$  | M38449                     | GGTGGAAACCCACAACGAAAT<br>TCTCGGAGCTCTGATGTGTTGA      | 85            | 75               |
| Foxp3         | NM_014009                  | GAGAAGGGCAGGGCACAAT<br>TGGGCCTGCATGGCAC101           | 101           | 83               |
| T-bet         | NM_013351                  | GGATGCGCCAGGAAGTTTCA<br>GACTGGAGCACAATCATCTGGG       | 91            | 79               |
| GATA-3        | NM_001002295               | AGCACAGAAGGCAGGGAGTGT<br>TGATAGAGCCCCGAGGCG          | 104           | 85               |
| Rory-T        | Anm_005060                 | GGCAAATACGGTGGCATGG<br>AAGGCACTTAGGGAGTGGGAGA        | 92            | 82               |
| CTLA4         | NM_005214                  | CATGGACACGGGACTCTACATCT<br>GGCACGGTTCTGGATCAATTAC    | 110           | 81               |
| IFN- $\gamma$ | NM_000619.2                | GTGTGGAGACCATCAAGGAAGACA<br>TTGGACATTCAAGTCAGTTACC   | 110           | 75               |
| GAPDH         | NM_002046                  | TGGTCTCCTCTGACTTCA<br>AGCCAAATTCGTTGTCAT             | 117           | 82               |

Table S2. Correlation of mRNA expression of T cell lineage-associated molecules against chemokines and their ligands on heart tissue from CCC patients using Spearman rank correlation.

| mRNA expression          | p      | r     |
|--------------------------|--------|-------|
| T-bet vs. CXCL9          | 0.006  | 0.692 |
| T-bet vs. CXCL10         | 0.014  | 0.640 |
| T-bet vs. CXCR3          | 0.009  | 0.666 |
| T-bet vs. CCL4           | 0.002  | 0.745 |
| T-bet vs. CCL5           | 0.015  | 0.635 |
| IFN- $\gamma$ vs. CXCL9  | 0.002  | 0.741 |
| IFN- $\gamma$ vs. CXCL10 | 0.032  | 0.574 |
| IFN- $\gamma$ vs. CXCR3  | 0.015  | 0.635 |
| IFN- $\gamma$ vs. CCL5   | 0.032  | 0.574 |
| IFN- $\gamma$ vs. CCR5   | 0.011  | 0.653 |
| IL-18 vs. CXCL9          | 0.001  | 0.771 |
| IL-18 vs. CXCL10         | 0.039  | 0.556 |
| IL-18 vs. CXCR3          | 0.0001 | 0.908 |
| IL-18 vs. CCL5           | 0.014  | 0.640 |
| IL-18 vs. CCR5           | 0.008  | 0.675 |
| IL-17 vs. CCR4           | 0.009  | 0.671 |
| FoxP3 vs. CXCL9          | 0.007  | 0.684 |
| FoxP3 vs. CXCL10         | 0.016  | 0.631 |
| FoxP3 vs. CXCR3          | 0.019  | 0.618 |
| CTLA-4 vs. CXCL9         | 0.002  | 0.741 |
| CTLA-4 vs. CXCL10        | 0.002  | 0.758 |
| CTLA-4 vs. CXCR3         | 0.005  | 0.701 |
| CTLA-4 vs. CCL4          | 0.001  | 0.789 |
| CTLA-4 vs. CCL5          | 0.011  | 0.653 |
| CTLA-4 vs. CCR5          | 0.022  | 0.604 |
| GATA-3 vs. CCR4          | 0.043  | 0.547 |
